# Supplementary material
Source: Elsevier journal article supplement (https://infoscience.epfl.ch/record/200488/files/mmc1.pdf)
Supplement: mmc1 [file mmc1.pdf]

**Supplementary Information for: Mechanism of oxygen reduction by metallocene near liquid|liquid interfaces**

T. Jane Stockmann,<sup>a</sup> Haiqiang Deng,<sup>a</sup> Pekka Peljo,<sup>a,b</sup> Kyösti Kontturi,<sup>b</sup> Marcin Opallo,<sup>c</sup> and Hubert H. Girault<sup>a,\*</sup>

<sup>a</sup>Laboratoire d'Electrochimie Physique et Analytique, Ecole Polytechnique Fédérale de Lausanne (EPFL), Station 6, CH-1015 Lausanne, Switzerland

<sup>b</sup>Department of Chemistry, Aalto University, P.O. Box 16100, 00076, Finland

<sup>c</sup>Institute of Physical Chemistry, Polish Academy of Sciences, ul. Kasprzaka 44/52, 01-224 Warszawa, Poland

\*To whom correspondence should be addressed. Tel: +41-21-693 3145; Fax: +41-21-693 3667;

Email: [hubert.girault@epfl.ch](mailto:hubert.girault@epfl.ch)

URL: <http://lepa.epfl.ch/>

**Contents:**

- (1) Figure S1: Simulated cyclic voltammograms for mesh validation.
- (2) Figure S2: Effect of multiple CV scans on DMFc<sup>+</sup> transfer wave intensity.
- (3) Figure S3: Chronoamperometry curve simulated near the positive edge of the PPW.
- (4) Figure S4: Simulated cyclic voltammograms replicating systems using DFc and Fc.
- (5) Table S1: Diffusion, concentration, and partition parameters used in COMSOL simulations
- (6) COMSOL 3.5a Model Report

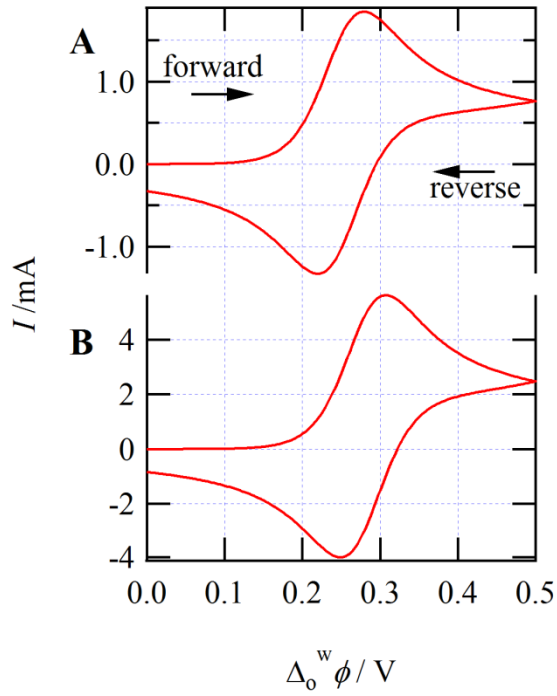

**Figure S1:** Simulated cyclic voltammograms of simple ion transfer of ion  $i$  of charge +1 transferring from w to o with initial concentrations  $c_{i,w}$  and  $c_{i,o}$  of 10 and 0 mol·m<sup>-3</sup>, respectively; the scan rate,  $\Delta_0^w \phi_i^{o'}$ ,  $k^o$ , and  $\alpha$  were set equal to 0.020 V·s<sup>-1</sup>, 0.250 V, 1 cm·s<sup>-1</sup>, and 0.5, respectively.  $D_{i,w}$  and  $D_{i,o}$  were both equal to  $1 \times 10^{-5}$  cm<sup>2</sup>·s<sup>-1</sup> in **A**, while in **B**,  $D_{i,w}$  was changed to  $9.3 \times 10^{-5}$  cm<sup>2</sup>·s<sup>-1</sup> to better reflect proton mass transport.

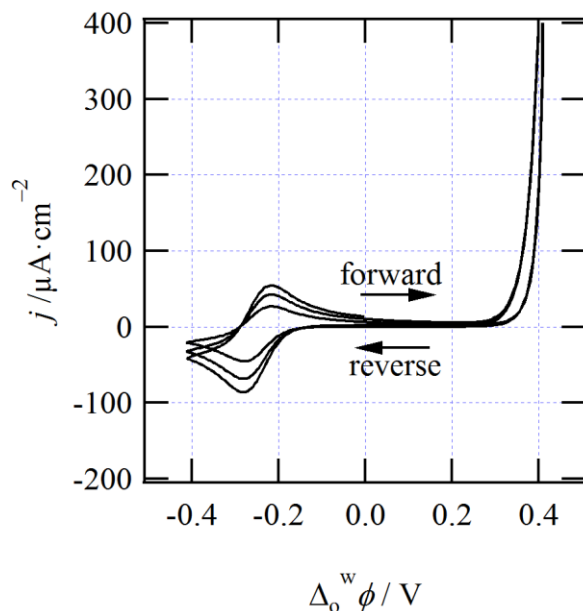

**Figure S2:** Simulated cyclic voltammogram obtained using the same simulation parameters described in Figure 6 of the main text except only  $c_{\text{H}^+, \text{w}}$  equal to  $1.000 \text{ mol}\cdot\text{L}^{-1}$  was utilized with a potential range of  $\pm 0.413 \text{ V}$ . Additionally the simulation run time was extended so that 3 forward/reverse sweeps were recorded.

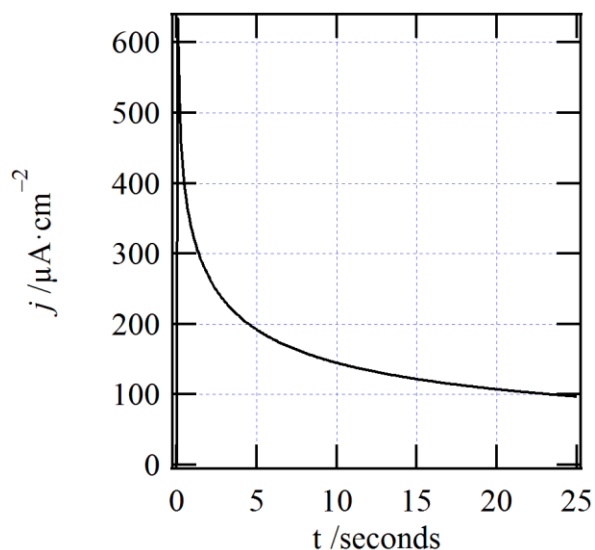

**Figure S3:** chronoamperometric curve generated using the simulation described in section 2 of the main text. Simulation parameters are the same as those described for Figure 7.

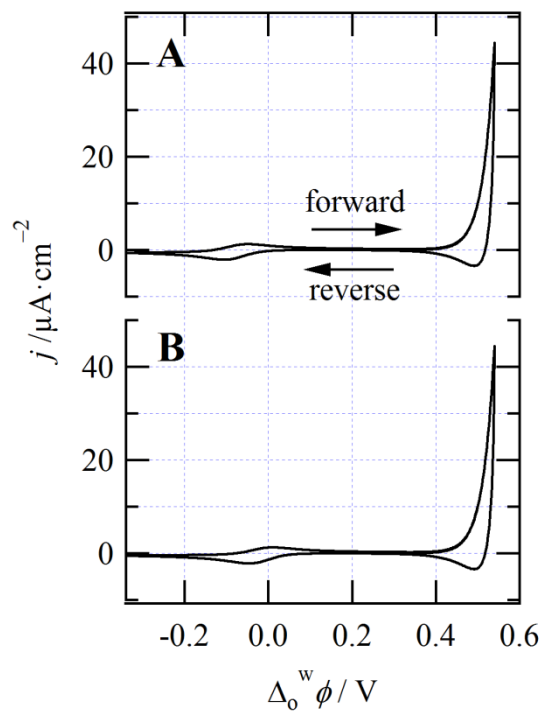

**Figure S4:** Simulated cyclic voltammograms of with the same simulation parameters a those listed for Figure 8 of the main text; however, with  $\Delta_o^w \phi_{\text{DFc}^+}^{o'}$  and  $\Delta_o^w \phi_{\text{DFc}^+}^{o'}$  equal to  $-0.078$  and  $-0.016$  V for **A** and **B**, respectively.  $k_{cf}$  and  $k_{\text{chem}}$ , were set equal to  $1 \times 10^2$  and  $5 \times 10^2$   $\text{L}\cdot\text{mol}^{-1}\cdot\text{s}^{-1}$ , respectively, and the initial  $\text{H}^+$  concentration was set equal to  $0.001$   $\text{mol}\cdot\text{L}^{-1}$ .

**Table S1:** Parameters used in the simulation including the diffusion coefficients in either phase ( $D_{i,w}/D_{i,o}$ ), the initial concentrations for either phase ( $c_{i,w}^*/c_{i,o}^*$ ), the formal ion transfer potentials ( $\Delta_o^w \phi_i^{o'}$ ), the partition coefficient ( $P_i^{o'}$ , from w to o), along with the final values of  $k_{cf}$  and  $k_{chem}$  for the associated electron donor species.

| Species                      | $D_{i,w}/D_{i,o}$<br>( $\times 10^{-5} \text{ cm}^2 \cdot \text{s}^{-1}$ ) | $c_{i,w}^*/c_{i,o}^*$<br>( $\text{mmol} \cdot \text{L}^{-1}$ ) | $\Delta_o^w \phi_i^{o'}$ (V) | $P_i^{o'}$ (w to o)    | $k_{cf}$                                | $k_{chem}$      |
|------------------------------|----------------------------------------------------------------------------|----------------------------------------------------------------|------------------------------|------------------------|-----------------------------------------|-----------------|
|                              |                                                                            |                                                                |                              |                        | (L·mol <sup>-1</sup> ·s <sup>-1</sup> ) |                 |
| H <sup>+</sup>               | 9.3/1.0                                                                    | y (Cell 1)/0                                                   | 0.580                        | $1.57 \times 10^{-10}$ |                                         |                 |
| SO <sub>4</sub> <sup>-</sup> | NA                                                                         | NA                                                             | -0.540                       | $7.44 \times 10^{-10}$ |                                         |                 |
| DMFc <sup>+</sup>            | 0.7/0.7                                                                    | 0/0                                                            | -0.250                       | $1.68 \times 10^4$     | $5 \times 10^2$                         | $1 \times 10^4$ |
| DFc <sup>+</sup>             | 0.7/0.7                                                                    | 0/5                                                            | -0.078                       | 21                     | $1 \times 10^2$                         | $5 \times 10^2$ |
| Fc <sup>+</sup>              | 0.7/0.7                                                                    | 0/5                                                            | -0.016                       | 2                      | $1 \times 10^2$                         | $5 \times 10^2$ |
| O <sub>2</sub>               | -/2.8                                                                      | -/1                                                            | -                            | 6                      |                                         |                 |
| BA                           | -                                                                          | -                                                              | -0.699                       | $6.55 \times 10^{11}$  |                                         |                 |
| TB                           | -                                                                          | -                                                              | 0.718                        | $1.37 \times 10^{12}$  |                                         |                 |

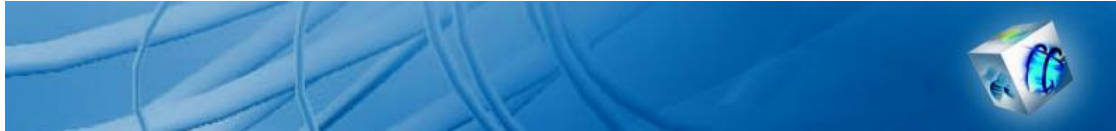

# COMSOL Model Report

## 1. Table of Contents

- Title - COMSOL Model Report
- Table of Contents
- Model Properties
- Constants
- Geometry
- Geom1
- Integration Coupling Variables
- Solver Settings
- Variables

## 2. Model Properties

| Property       | Value                    |
|----------------|--------------------------|
| Model name     |                          |
| Author         |                          |
| Company        |                          |
| Department     |                          |
| Reference      |                          |
| URL            |                          |
| Saved date     | Jan 13, 2014 11:27:32 AM |
| Creation date  | Sep 9, 2013 11:57:51 AM  |
| COMSOL version | COMSOL 3.5.0.603         |

File name: D:\documents\01-groupmeeting\manuscripts\manuscript\_ORRsim\2013\_1031\_ORR\2013\_1219\_ORR.mph

Application modes and modules used in this model:

- Geom1 (Axial symmetry (2D))
  - Diffusion (Chemical Engineering Module)
  - Diffusion (Chemical Engineering Module)

## 3. Constants

| Name | Expression     | Value | Description |
|------|----------------|-------|-------------|
| F    | 96485 [C/mol]  |       |             |
| T    | 298.15 [K]     |       |             |
| R    | 8.314[J/mol/K] |       |             |
| fara | $F/(R*T)$      |       |             |

|              |                 |  |                        |
|--------------|-----------------|--|------------------------|
| cHaqi        | 10[mmol/L]      |  |                        |
| cHorgi       | 0[mmol/L]       |  |                        |
| cH2i         | 0[mmol/L]       |  |                        |
| cFcHi        | 0[mmol/L]       |  |                        |
| cO2i         | 1.3[mmol/L]     |  |                        |
| cO2Hi        | 0[mmol/L]       |  |                        |
| cDMFc        | 0[mmol/L]       |  |                        |
| cDMFcplusi   | 0[mmol/L]       |  |                        |
| cDMFcplusaqi | 0[mmol/L]       |  |                        |
| D_H          | 9.3e-9[m^2/s]   |  |                        |
| D_DMFC       | 0.726e-9[m^2/s] |  |                        |
| D_DMFCplus   | 7.26e-6[cm^2/s] |  | from Haiqiangs data    |
| D_O2         | 2.76e-9[m^2/s]  |  |                        |
| D_Horg       | 0.5e-9[m^2/s]   |  |                        |
| Ei           | 0.0[V]          |  |                        |
| Ef           | 0.452[V]        |  |                        |
| E0           | 0.580[V]        |  | H+ IT                  |
| E02          | -0.250[V]       |  | DMFc+ IT               |
| nu           | 0.02[V/s]       |  | scan rate              |
| alpha        | 0.5             |  |                        |
| test1        | R*T/F           |  |                        |
| n1           | 1               |  | number of electrons    |
| k0           | 1[cm/s]         |  | standard rate constant |
| kcf          | 5e+2[L/mol/s]   |  |                        |
| kcb          | 1[1/s]          |  |                        |
| K            | kcf/kcb         |  |                        |
| kchem        | 1e+10[L/mol/s]  |  |                        |
| kf_jane      | 1[m/s]          |  |                        |

#### 4. Geometry

Number of geometries: 1

#### 4.1. Geom1

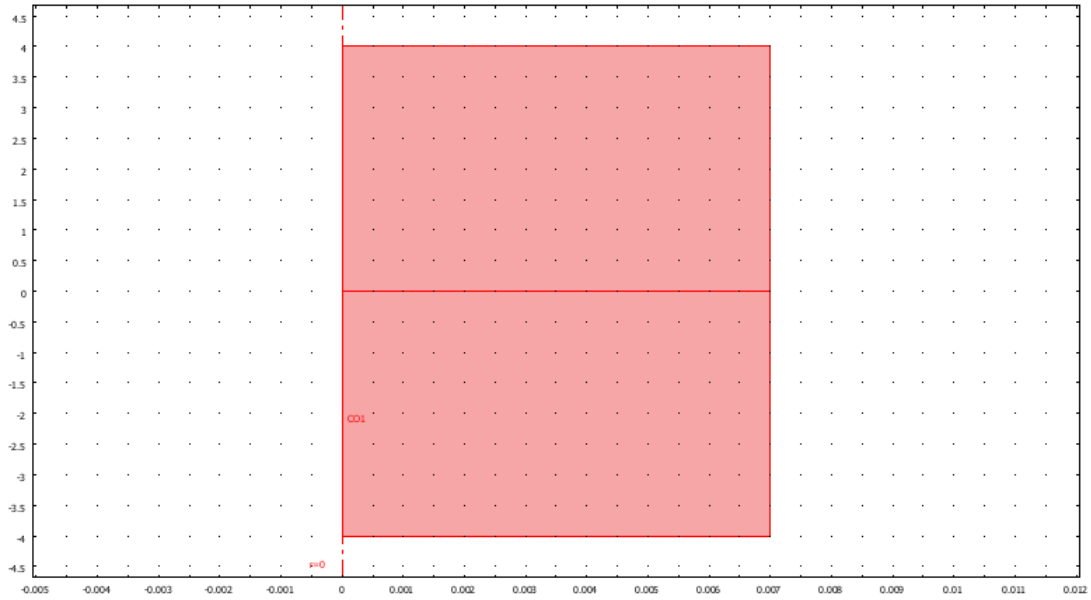



#### 4.1.1. Point mode

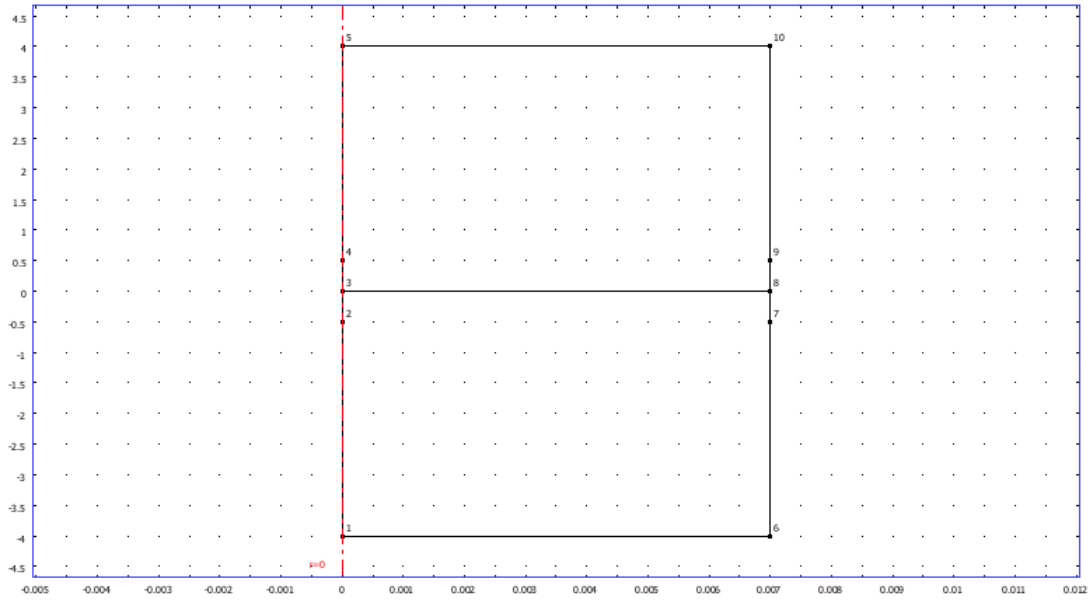

#### 4.1.2. Boundary mode

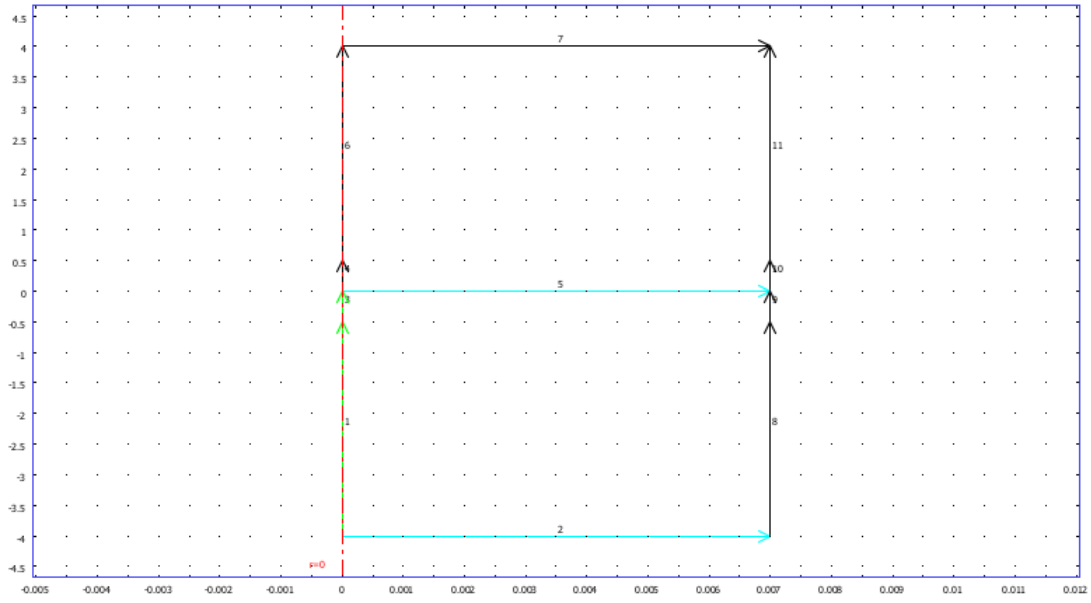

### 4.1.3. Subdomain mode

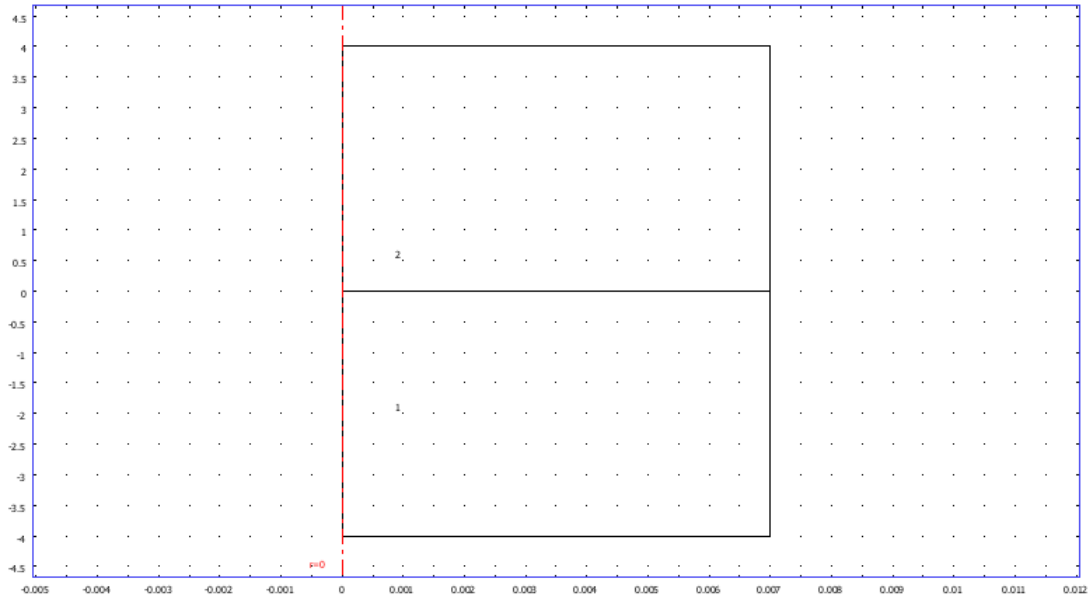

## 5. Geom1

Space dimensions: Axial symmetry (2D)

Independent variables: r, phi, z

### 5.1. Scalar Expressions

| Name   | Expression                                                                               | Unit | Description |
|--------|------------------------------------------------------------------------------------------|------|-------------|
| E_swp  | $E_i + (2 * (E_f - E_i)) / \pi * \text{asin}(\sin((\pi * \nu * t) / (2 * (E_f - E_i))))$ | V    |             |
| kf     | $k_0 * \exp(-\alpha * \text{fara} * n_1 * (E_{\text{swp}} - E_0))$                       | m/s  | H+ IT       |
| kb     | $k_0 * \exp((1 - \alpha) * \text{fara} * n_1 * (E_{\text{swp}} - E_0))$                  | m/s  |             |
| kf2    | $k_0 * \exp(-\alpha * \text{fara} * n_1 * (E_{\text{swp}} - E_{02}))$                    | m/s  | DMFc+ IT    |
| kb2    | $k_0 * \exp((1 - \alpha) * \text{fara} * n_1 * (E_{\text{swp}} - E_{02}))$               | m/s  |             |
| E_swp2 | $(E_i) * (t < 25) + (E_f) * (t \geq 25)$                                                 | V    |             |

### 5.2. Expressions

#### 5.2.1. Subdomain Expressions

| Subdomain |                    | 1    | 2   |
|-----------|--------------------|------|-----|
| cH        | mol/m <sup>3</sup> | Horg | Haq |

### 5.3. Mesh

#### 5.3.1. Mesh Statistics

|                              |       |
|------------------------------|-------|
| Number of degrees of freedom | 44856 |
| Number of mesh points        | 2738  |
| Number of elements           | 5356  |
| Triangular                   | 5356  |
| Quadrilateral                | 0     |
| Number of boundary elements  | 318   |
| Number of vertex elements    | 10    |
| Minimum element quality      | 0.797 |
| Element area ratio           | 0.002 |

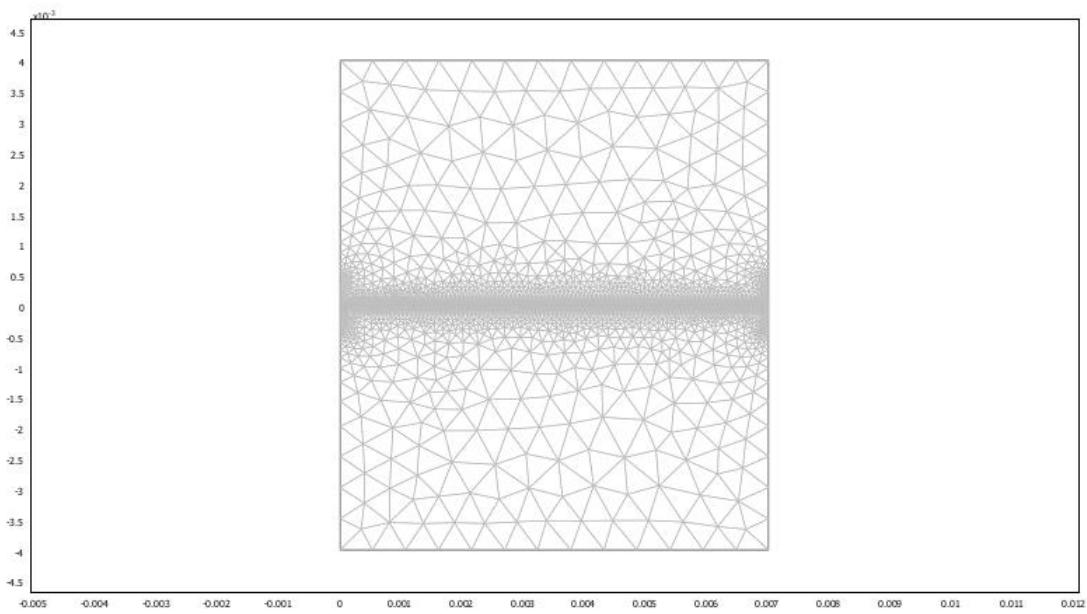

### 5.4. Application Mode: Diffusion (chdi2)

Application mode type: Diffusion (Chemical Engineering Module)

Application mode name: chdi2

#### 5.4.1. Application Mode Properties

| Property | Value |
|----------|-------|
|----------|-------|

|                        |                      |
|------------------------|----------------------|
| Default element type   | Lagrange - Quadratic |
| Analysis type          | Transient            |
| Equilibrium assumption | Off                  |
| Frame                  | Frame (ref)          |
| Weak constraints       | Off                  |
| Constraint type        | Ideal                |

#### 5.4.2. Variables

Dependent variables: Horg, Fc, Fcplus, FcH, O2, O2H

Shape functions: shlag(2,'Horg'), shlag(2,'Fc'), shlag(2,'Fcplus'), shlag(2,'FcH'), shlag(2,'O2'), shlag(2,'O2H')

Interior boundaries not active

#### 5.4.3. Boundary Settings

|                    |                         |                     |                                             |                                                   |
|--------------------|-------------------------|---------------------|---------------------------------------------|---------------------------------------------------|
| Boundary           |                         | 1, 3                | 2                                           | 5                                                 |
| Type               |                         | Axial symmetry      | Concentration                               | Flux                                              |
| Inward flux (N)    | mol/(m <sup>2</sup> .s) | {0;0;0;0;0;0}       | {0;0;0;0;0;0}                               | {kb*Haq-kf*Horg;0;-kf2*Fcplus+kb2*Fcplusaq;0;0;0} |
| Concentration (c0) | mol/m <sup>3</sup>      | {0;0;0;0;0;0}       | {cHorgi;cDMFci;cDMFcplusi;cFcHi;cO2i;cO2Hi} | {0;0;0;0;0;0}                                     |
| Boundary           |                         | 8-9                 |                                             |                                                   |
| Type               |                         | Insulation/Symmetry |                                             |                                                   |
| Inward flux (N)    | mol/(m <sup>2</sup> .s) | {0;0;0;0;0;0}       |                                             |                                                   |
| Concentration (c0) | mol/m <sup>3</sup>      | {0;0;0;0;0;0}       |                                             |                                                   |

#### 5.4.4. Subdomain Settings

|                                |                         |                                                                                                                          |  |  |
|--------------------------------|-------------------------|--------------------------------------------------------------------------------------------------------------------------|--|--|
| Subdomain                      |                         | 1                                                                                                                        |  |  |
| Diffusion coefficient (D)      | m <sup>2</sup> /s       | {D_Horg;D_DMFc;D_DMFcplus;D_DMFc;D_O2;D_O2}                                                                              |  |  |
| Reaction rate (R)              | mol/(m <sup>3</sup> .s) | {-kcf*Horg*Fc+kcb*FcH;-kcf*Horg*Fc+kcb*FcH;kchem2*FcH*O2;kcf*Horg*Fc-kcb*FcH-kchem2*FcH*O2;-kchem2*FcH*O2;kchem2*FcH*O2} |  |  |
| Subdomain initial value        |                         | 1                                                                                                                        |  |  |
| Concentration, Horg (Horg)     | mol/m <sup>3</sup>      | cHorgi                                                                                                                   |  |  |
| Concentration, Fc (Fc)         | mol/m <sup>3</sup>      | cDMFci                                                                                                                   |  |  |
| Concentration, Fcplus (Fcplus) | mol/m <sup>3</sup>      | cDMFcplusi                                                                                                               |  |  |
| Concentration, FcH (FcH)       | mol/m <sup>3</sup>      | cFcHi                                                                                                                    |  |  |
| Concentration, O2 (O2)         | mol/m <sup>3</sup>      | cO2i                                                                                                                     |  |  |
| Concentration, O2H (O2H)       | mol/m <sup>3</sup>      | cO2Hi                                                                                                                    |  |  |

### 5.5. Application Mode: Diffusion (chdi)

Application mode type: Diffusion (Chemical Engineering Module)

Application mode name: chdi

#### 5.5.1. Application Mode Properties

| Property               | Value                |
|------------------------|----------------------|
| Default element type   | Lagrange - Quadratic |
| Analysis type          | Transient            |
| Equilibrium assumption | Off                  |
| Frame                  | Frame (ref)          |
| Weak constraints       | Off                  |
| Constraint type        | Ideal                |

#### 5.5.2. Variables

Dependent variables: Haq, Fcplusaq

Shape functions: shlag(2,'Haq'), shlag(2,'Fcplusaq')

Interior boundaries not active

#### 5.5.3. Boundary Settings

|                    |                         |                                             |                |                      |
|--------------------|-------------------------|---------------------------------------------|----------------|----------------------|
| Boundary           |                         | 10-11                                       | 4, 6           | 7                    |
| Type               |                         | Insulation/Symmetry                         | Axial symmetry | Concentration        |
| Inward flux (N)    | mol/(m <sup>2</sup> .s) | {0;0}                                       | {0;0}          | {0;0}                |
| Concentration (c0) | mol/m <sup>3</sup>      | {0;0}                                       | {0;0}          | {cHaqi;cDMFcplusaqi} |
| Boundary           |                         | 5                                           |                |                      |
| Type               |                         | Flux                                        |                |                      |
| Inward flux (N)    | mol/(m <sup>2</sup> .s) | {{-kb*Haq+kf*Horg};kf2*Fcplus-kb2*Fcplusaq} |                |                      |
| Concentration (c0) | mol/m <sup>3</sup>      | {0;0}                                       |                |                      |

#### 5.5.4. Subdomain Settings

|                                    |                    |                  |
|------------------------------------|--------------------|------------------|
| Subdomain                          |                    | 2                |
| Diffusion coefficient (D)          | m <sup>2</sup> /s  | {D_H;D_DMFCplus} |
| Subdomain initial value            |                    | 2                |
| Concentration, Haq (Haq)           | mol/m <sup>3</sup> | cHaqi            |
| Concentration, Fcplusaq (Fcplusaq) | mol/m <sup>3</sup> | cDMFcplusaqi     |

## 6. Integration Coupling Variables

### 6.1. Geom1

#### 6.1.1. Source Boundary: 5

| Name          | Value                                                                                          |
|---------------|------------------------------------------------------------------------------------------------|
| Variable name | lbar                                                                                           |
| Expression    | $2 \cdot \pi \cdot r \cdot F \cdot (\text{ndflux\_Haq\_chdi} + \text{ndflux\_Fcplusaq\_chdi})$ |
| Order         | 4                                                                                              |
| Global        | Yes                                                                                            |

## 7. Solver Settings

Solve using a script: off

|                          |                |
|--------------------------|----------------|
| Analysis type            | Transient      |
| Auto select solver       | On             |
| Solver                   | Time dependent |
| Solution form            | Automatic      |
| Symmetric                | auto           |
| Adaptive mesh refinement | Off            |
| Optimization/Sensitivity | Off            |
| Plot while solving       | Off            |

### 7.1. Direct (UMFPACK)

Solver type: Linear system solver

| Parameter                | Value |
|--------------------------|-------|
| Pivot threshold          | 0.1   |
| Memory allocation factor | 0.7   |

### 7.2. Time Stepping

| Parameter                                | Value             |
|------------------------------------------|-------------------|
| Times                                    | range(0,0.1,45.2) |
| Relative tolerance                       | 1e-7              |
| Absolute tolerance                       | 1e-7              |
| Times to store in output                 | Specified times   |
| Time steps taken by solver               | Free              |
| Maximum BDF order                        | 5                 |
| Singular mass matrix                     | Maybe             |
| Consistent initialization of DAE systems | Backward Euler    |
| Error estimation strategy                | Include algebraic |
| Allow complex numbers                    | Off               |

### 7.3. Advanced

| Parameter                                                              | Value       |
|------------------------------------------------------------------------|-------------|
| Constraint handling method                                             | Elimination |
| Null-space function                                                    | Automatic   |
| Automatic assembly block size                                          | On          |
| Assembly block size                                                    | 1000        |
| Use Hermitian transpose of constraint matrix and in symmetry detection | Off         |
| Use complex functions with real input                                  | Off         |
| Stop if error due to undefined operation                               | On          |
| Store solution on file                                                 | Off         |
| Type of scaling                                                        | Automatic   |
| Manual scaling                                                         |             |
| Row equilibration                                                      | On          |
| Manual control of reassembly                                           | Off         |
| Load constant                                                          | On          |
| Constraint constant                                                    | On          |
| Mass constant                                                          | On          |
| Damping (mass) constant                                                | On          |
| Jacobian constant                                                      | On          |
| Constraint Jacobian constant                                           | On          |

## 8. Variables

### 8.1. Boundary

#### 8.1.1. Boundary 1-3, 8-9

| Name                 | Description                     | Unit                    | Expression                                                      |
|----------------------|---------------------------------|-------------------------|-----------------------------------------------------------------|
| ndflux_Horg_chdi2    | Normal diffusive flux, Horg     | mol/(m <sup>2</sup> *s) | nr_chdi2 * dflux_Horg_r_chdi2+nz_chdi2 * dflux_Horg_z_chdi2     |
| ndflux_Fc_chdi2      | Normal diffusive flux, Fc       | mol/(m <sup>2</sup> *s) | nr_chdi2 * dflux_Fc_r_chdi2+nz_chdi2 * dflux_Fc_z_chdi2         |
| ndflux_Fcplus_chdi2  | Normal diffusive flux, Fcplus   | mol/(m <sup>2</sup> *s) | nr_chdi2 * dflux_Fcplus_r_chdi2+nz_chdi2 * dflux_Fcplus_z_chdi2 |
| ndflux_FcH_chdi2     | Normal diffusive flux, FcH      | mol/(m <sup>2</sup> *s) | nr_chdi2 * dflux_FcH_r_chdi2+nz_chdi2 * dflux_FcH_z_chdi2       |
| ndflux_O2_chdi2      | Normal diffusive flux, O2       | mol/(m <sup>2</sup> *s) | nr_chdi2 * dflux_O2_r_chdi2+nz_chdi2 * dflux_O2_z_chdi2         |
| ndflux_O2H_chdi2     | Normal diffusive flux, O2H      | mol/(m <sup>2</sup> *s) | nr_chdi2 * dflux_O2H_r_chdi2+nz_chdi2 * dflux_O2H_z_chdi2       |
| ndflux_Haq_chdi      | Normal diffusive flux, Haq      | mol/(m <sup>2</sup> *s) |                                                                 |
| ndflux_Fcplusaq_chdi | Normal diffusive flux, Fcplusaq | mol/(m <sup>2</sup> *s) |                                                                 |

#### 8.1.2. Boundary 4, 6-7, 10-11

| Name              | Description                 | Unit                    | Expression |
|-------------------|-----------------------------|-------------------------|------------|
| ndflux_Horg_chdi2 | Normal diffusive flux, Horg | mol/(m <sup>2</sup> *s) |            |
| ndflux_Fc_chdi2   | Normal diffusive flux, Fc   | mol/(m <sup>2</sup> *s) |            |



|                      |                                 |                         |                                                                 |
|----------------------|---------------------------------|-------------------------|-----------------------------------------------------------------|
| ndflux_Fcplus_chdi2  | Normal diffusive flux, Fcplus   | mol/(m <sup>2</sup> *s) |                                                                 |
| ndflux_FcH_chdi2     | Normal diffusive flux, FcH      | mol/(m <sup>2</sup> *s) |                                                                 |
| ndflux_O2_chdi2      | Normal diffusive flux, O2       | mol/(m <sup>2</sup> *s) |                                                                 |
| ndflux_O2H_chdi2     | Normal diffusive flux, O2H      | mol/(m <sup>2</sup> *s) |                                                                 |
| ndflux_Haq_chdi      | Normal diffusive flux, Haq      | mol/(m <sup>2</sup> *s) | nr_chdi * dflux_Haq_r_chdi+nz_chdi * dflux_Haq_z_chdi           |
| ndflux_Fcplusaq_chdi | Normal diffusive flux, Fcplusaq | mol/(m <sup>2</sup> *s) | nr_chdi * dflux_Fcplusaq_r_chdi+nz_chdi * dflux_Fcplusaq_z_chdi |

### 8.1.3. Boundary 5

| Name                 | Description                     | Unit                    | Expression                                                      |
|----------------------|---------------------------------|-------------------------|-----------------------------------------------------------------|
| ndflux_Horg_chdi2    | Normal diffusive flux, Horg     | mol/(m <sup>2</sup> *s) | nr_chdi2 * dflux_Horg_r_chdi2+nz_chdi2 * dflux_Horg_z_chdi2     |
| ndflux_Fc_chdi2      | Normal diffusive flux, Fc       | mol/(m <sup>2</sup> *s) | nr_chdi2 * dflux_Fc_r_chdi2+nz_chdi2 * dflux_Fc_z_chdi2         |
| ndflux_Fcplus_chdi2  | Normal diffusive flux, Fcplus   | mol/(m <sup>2</sup> *s) | nr_chdi2 * dflux_Fcplus_r_chdi2+nz_chdi2 * dflux_Fcplus_z_chdi2 |
| ndflux_FcH_chdi2     | Normal diffusive flux, FcH      | mol/(m <sup>2</sup> *s) | nr_chdi2 * dflux_FcH_r_chdi2+nz_chdi2 * dflux_FcH_z_chdi2       |
| ndflux_O2_chdi2      | Normal diffusive flux, O2       | mol/(m <sup>2</sup> *s) | nr_chdi2 * dflux_O2_r_chdi2+nz_chdi2 * dflux_O2_z_chdi2         |
| ndflux_O2H_chdi2     | Normal diffusive flux, O2H      | mol/(m <sup>2</sup> *s) | nr_chdi2 * dflux_O2H_r_chdi2+nz_chdi2 * dflux_O2H_z_chdi2       |
| ndflux_Haq_chdi      | Normal diffusive flux, Haq      | mol/(m <sup>2</sup> *s) | nr_chdi * dflux_Haq_r_chdi+nz_chdi * dflux_Haq_z_chdi           |
| ndflux_Fcplusaq_chdi | Normal diffusive flux, Fcplusaq | mol/(m <sup>2</sup> *s) | nr_chdi * dflux_Fcplusaq_r_chdi+nz_chdi * dflux_Fcplusaq_z_chdi |

## 8.2. Subdomain

### 8.2.1. Subdomain 1

| Name               | Description                               | Unit                    | Expression                                                              |
|--------------------|-------------------------------------------|-------------------------|-------------------------------------------------------------------------|
| grad_Horg_r_chdi2  | Concentration gradient, Horg, r component | mol/m <sup>4</sup>      | Horgr                                                                   |
| dflux_Horg_r_chdi2 | Diffusive flux, Horg, r component         | mol/(m <sup>2</sup> *s) | -Drr_Horg_chdi2 * Horgr-Drz_Horg_chdi2 * Horgz                          |
| grad_Horg_z_chdi2  | Concentration gradient, Horg, z component | mol/m <sup>4</sup>      | Horgz                                                                   |
| dflux_Horg_z_chdi2 | Diffusive flux, Horg, z component         | mol/(m <sup>2</sup> *s) | -Dzr_Horg_chdi2 * Horgr-Dzz_Horg_chdi2 * Horgz                          |
| grad_Horg_chdi2    | Concentration gradient, Horg              | mol/m <sup>4</sup>      | sqrt(grad_Horg_r_chdi2 <sup>2</sup> +grad_Horg_z_chdi2 <sup>2</sup> )   |
| dflux_Horg_chdi2   | Diffusive flux, Horg                      | mol/(m <sup>2</sup> *s) | sqrt(dflux_Horg_r_chdi2 <sup>2</sup> +dflux_Horg_z_chdi2 <sup>2</sup> ) |
| grad_Fc_r_chdi2    | Concentration gradient, Fc, r component   | mol/m <sup>4</sup>      | Fcr                                                                     |
| dflux_Fc_r_chdi2   | Diffusive flux, Fc, r component           | mol/(m <sup>2</sup> *s) | -Drr_Fc_chdi2 * Fcr-Drz_Fc_chdi2 * Fcz                                  |
| grad_Fc_z_chdi2    | Concentration gradient, Fc, z component   | mol/m <sup>4</sup>      | Fcz                                                                     |
| dflux_Fc_z_chdi2   | Diffusive flux, Fc, z component           | mol/(m <sup>2</sup> *s) | -Dzr_Fc_chdi2 * Fcr-Dzz_Fc_chdi2 * Fcz                                  |
| grad_Fc_chdi2      | Concentration gradient, Fc                | mol/m <sup>4</sup>      | sqrt(grad_Fc_r_chdi2 <sup>2</sup> +grad_Fc_z_chdi2 <sup>2</sup> )       |
| dflux_Fc_chdi2     | Diffusive flux, Fc                        | mol/(m <sup>2</sup> *s) | sqrt(dflux_Fc_r_chdi2 <sup>2</sup> +dflux_Fc_z_chdi2 <sup>2</sup> )     |

|                      |                                             |                         |                                                                             |
|----------------------|---------------------------------------------|-------------------------|-----------------------------------------------------------------------------|
| grad_Fcplus_r_chdi2  | Concentration gradient, Fcplus, r component | mol/m <sup>4</sup>      | Fcplusr                                                                     |
| dflux_Fcplus_r_chdi2 | Diffusive flux, Fcplus, r component         | mol/(m <sup>2</sup> *s) | -Drr_Fcplus_chdi2 * Fcplusr-Drz_Fcplus_chdi2 * Fcplusz                      |
| grad_Fcplus_z_chdi2  | Concentration gradient, Fcplus, z component | mol/m <sup>4</sup>      | Fcplusz                                                                     |
| dflux_Fcplus_z_chdi2 | Diffusive flux, Fcplus, z component         | mol/(m <sup>2</sup> *s) | -Dzr_Fcplus_chdi2 * Fcplusr-Dzz_Fcplus_chdi2 * Fcplusz                      |
| grad_Fcplus_chdi2    | Concentration gradient, Fcplus              | mol/m <sup>4</sup>      | sqrt(grad_Fcplus_r_chdi2 <sup>2</sup> +grad_Fcplus_z_chdi2 <sup>2</sup> )   |
| dflux_Fcplus_chdi2   | Diffusive flux, Fcplus                      | mol/(m <sup>2</sup> *s) | sqrt(dflux_Fcplus_r_chdi2 <sup>2</sup> +dflux_Fcplus_z_chdi2 <sup>2</sup> ) |
| grad_FcH_r_chdi2     | Concentration gradient, FcH, r component    | mol/m <sup>4</sup>      | FcHr                                                                        |
| dflux_FcH_r_chdi2    | Diffusive flux, FcH, r component            | mol/(m <sup>2</sup> *s) | -Drr_FcH_chdi2 * FcHr-Drz_FcH_chdi2 * FcHz                                  |
| grad_FcH_z_chdi2     | Concentration gradient, FcH, z component    | mol/m <sup>4</sup>      | FcHz                                                                        |
| dflux_FcH_z_chdi2    | Diffusive flux, FcH, z component            | mol/(m <sup>2</sup> *s) | -Dzr_FcH_chdi2 * FcHr-Dzz_FcH_chdi2 * FcHz                                  |
| grad_FcH_chdi2       | Concentration gradient, FcH                 | mol/m <sup>4</sup>      | sqrt(grad_FcH_r_chdi2 <sup>2</sup> +grad_FcH_z_chdi2 <sup>2</sup> )         |
| dflux_FcH_chdi2      | Diffusive flux, FcH                         | mol/(m <sup>2</sup> *s) | sqrt(dflux_FcH_r_chdi2 <sup>2</sup> +dflux_FcH_z_chdi2 <sup>2</sup> )       |
| grad_O2_r_chdi2      | Concentration gradient, O2, r component     | mol/m <sup>4</sup>      | O2r                                                                         |
| dflux_O2_r_chdi2     | Diffusive flux, O2, r component             | mol/(m <sup>2</sup> *s) | -Drr_O2_chdi2 * O2r-Drz_O2_chdi2 * O2z                                      |
| grad_O2_z_chdi2      | Concentration gradient, O2, z component     | mol/m <sup>4</sup>      | O2z                                                                         |
| dflux_O2_z_chdi2     | Diffusive flux, O2, z component             | mol/(m <sup>2</sup> *s) | -Dzr_O2_chdi2 * O2r-Dzz_O2_chdi2 * O2z                                      |
| grad_O2_chdi2        | Concentration gradient, O2                  | mol/m <sup>4</sup>      | sqrt(grad_O2_r_chdi2 <sup>2</sup> +grad_O2_z_chdi2 <sup>2</sup> )           |
| dflux_O2_chdi2       | Diffusive flux, O2                          | mol/(m <sup>2</sup> *s) | sqrt(dflux_O2_r_chdi2 <sup>2</sup> +dflux_O2_z_chdi2 <sup>2</sup> )         |
| grad_O2H_r_chdi2     | Concentration gradient, O2H, r component    | mol/m <sup>4</sup>      | O2Hr                                                                        |
| dflux_O2H_r_chdi2    | Diffusive flux, O2H, r component            | mol/(m <sup>2</sup> *s) | -Drr_O2H_chdi2 * O2Hr-Drz_O2H_chdi2 * O2Hz                                  |
| grad_O2H_z_chdi2     | Concentration gradient, O2H, z component    | mol/m <sup>4</sup>      | O2Hz                                                                        |
| dflux_O2H_z_chdi2    | Diffusive flux, O2H, z component            | mol/(m <sup>2</sup> *s) | -Dzr_O2H_chdi2 * O2Hr-Dzz_O2H_chdi2 * O2Hz                                  |
| grad_O2H_chdi2       | Concentration gradient, O2H                 | mol/m <sup>4</sup>      | sqrt(grad_O2H_r_chdi2 <sup>2</sup> +grad_O2H_z_chdi2 <sup>2</sup> )         |
| dflux_O2H_chdi2      | Diffusive flux, O2H                         | mol/(m <sup>2</sup> *s) | sqrt(dflux_O2H_r_chdi2 <sup>2</sup> +dflux_O2H_z_chdi2 <sup>2</sup> )       |
| grad_Haq_r_chdi      | Concentration gradient, Haq, r component    | mol/m <sup>4</sup>      |                                                                             |
| dflux_Haq_r_chdi     | Diffusive flux, Haq, r component            | mol/(m <sup>2</sup> *s) |                                                                             |
| grad_Haq_z_chdi      | Concentration gradient, Haq, z component    | mol/m <sup>4</sup>      |                                                                             |
| dflux_Haq_z_chdi     | Diffusive flux, Haq, z component            | mol/(m <sup>2</sup> *s) |                                                                             |
| grad_Haq_chdi        | Concentration gradient, Haq                 | mol/m <sup>4</sup>      |                                                                             |
| dflux_Haq_chdi       | Diffusive flux, Haq                         | mol/(m <sup>2</sup> *s) |                                                                             |

|                       |                                               |                         |  |
|-----------------------|-----------------------------------------------|-------------------------|--|
| grad_Fcplusaq_r_chdi  | Concentration gradient, Fcplusaq, r component | mol/m <sup>4</sup>      |  |
| dflux_Fcplusaq_r_chdi | Diffusive flux, Fcplusaq, r component         | mol/(m <sup>2</sup> *s) |  |
| grad_Fcplusaq_z_chdi  | Concentration gradient, Fcplusaq, z component | mol/m <sup>4</sup>      |  |
| dflux_Fcplusaq_z_chdi | Diffusive flux, Fcplusaq, z component         | mol/(m <sup>2</sup> *s) |  |
| grad_Fcplusaq_chdi    | Concentration gradient, Fcplusaq              | mol/m <sup>4</sup>      |  |
| dflux_Fcplusaq_chdi   | Diffusive flux, Fcplusaq                      | mol/(m <sup>2</sup> *s) |  |

### 8.2.2. Subdomain 2

| Name                 | Description                                 | Unit                    | Expression |
|----------------------|---------------------------------------------|-------------------------|------------|
| grad_Horg_r_chdi2    | Concentration gradient, Horg, r component   | mol/m <sup>4</sup>      |            |
| dflux_Horg_r_chdi2   | Diffusive flux, Horg, r component           | mol/(m <sup>2</sup> *s) |            |
| grad_Horg_z_chdi2    | Concentration gradient, Horg, z component   | mol/m <sup>4</sup>      |            |
| dflux_Horg_z_chdi2   | Diffusive flux, Horg, z component           | mol/(m <sup>2</sup> *s) |            |
| grad_Horg_chdi2      | Concentration gradient, Horg                | mol/m <sup>4</sup>      |            |
| dflux_Horg_chdi2     | Diffusive flux, Horg                        | mol/(m <sup>2</sup> *s) |            |
| grad_Fc_r_chdi2      | Concentration gradient, Fc, r component     | mol/m <sup>4</sup>      |            |
| dflux_Fc_r_chdi2     | Diffusive flux, Fc, r component             | mol/(m <sup>2</sup> *s) |            |
| grad_Fc_z_chdi2      | Concentration gradient, Fc, z component     | mol/m <sup>4</sup>      |            |
| dflux_Fc_z_chdi2     | Diffusive flux, Fc, z component             | mol/(m <sup>2</sup> *s) |            |
| grad_Fc_chdi2        | Concentration gradient, Fc                  | mol/m <sup>4</sup>      |            |
| dflux_Fc_chdi2       | Diffusive flux, Fc                          | mol/(m <sup>2</sup> *s) |            |
| grad_Fcplus_r_chdi2  | Concentration gradient, Fcplus, r component | mol/m <sup>4</sup>      |            |
| dflux_Fcplus_r_chdi2 | Diffusive flux, Fcplus, r component         | mol/(m <sup>2</sup> *s) |            |
| grad_Fcplus_z_chdi2  | Concentration gradient, Fcplus, z component | mol/m <sup>4</sup>      |            |
| dflux_Fcplus_z_chdi2 | Diffusive flux, Fcplus, z component         | mol/(m <sup>2</sup> *s) |            |
| grad_Fcplus_chdi2    | Concentration gradient, Fcplus              | mol/m <sup>4</sup>      |            |
| dflux_Fcplus_chdi2   | Diffusive flux, Fcplus                      | mol/(m <sup>2</sup> *s) |            |
| grad_FcH_r_chdi2     | Concentration gradient, FcH, r component    | mol/m <sup>4</sup>      |            |
| dflux_FcH_r_chdi2    | Diffusive flux, FcH, r component            | mol/(m <sup>2</sup> *s) |            |

|                       |                                               |                         |                                                                               |
|-----------------------|-----------------------------------------------|-------------------------|-------------------------------------------------------------------------------|
| grad_FcH_z_chdi2      | Concentration gradient, FcH, z component      | mol/m <sup>4</sup>      |                                                                               |
| dflux_FcH_z_chdi2     | Diffusive flux, FcH, z component              | mol/(m <sup>2</sup> *s) |                                                                               |
| grad_FcH_chdi2        | Concentration gradient, FcH                   | mol/m <sup>4</sup>      |                                                                               |
| dflux_FcH_chdi2       | Diffusive flux, FcH                           | mol/(m <sup>2</sup> *s) |                                                                               |
| grad_O2_r_chdi2       | Concentration gradient, O2, r component       | mol/m <sup>4</sup>      |                                                                               |
| dflux_O2_r_chdi2      | Diffusive flux, O2, r component               | mol/(m <sup>2</sup> *s) |                                                                               |
| grad_O2_z_chdi2       | Concentration gradient, O2, z component       | mol/m <sup>4</sup>      |                                                                               |
| dflux_O2_z_chdi2      | Diffusive flux, O2, z component               | mol/(m <sup>2</sup> *s) |                                                                               |
| grad_O2_chdi2         | Concentration gradient, O2                    | mol/m <sup>4</sup>      |                                                                               |
| dflux_O2_chdi2        | Diffusive flux, O2                            | mol/(m <sup>2</sup> *s) |                                                                               |
| grad_O2H_r_chdi2      | Concentration gradient, O2H, r component      | mol/m <sup>4</sup>      |                                                                               |
| dflux_O2H_r_chdi2     | Diffusive flux, O2H, r component              | mol/(m <sup>2</sup> *s) |                                                                               |
| grad_O2H_z_chdi2      | Concentration gradient, O2H, z component      | mol/m <sup>4</sup>      |                                                                               |
| dflux_O2H_z_chdi2     | Diffusive flux, O2H, z component              | mol/(m <sup>2</sup> *s) |                                                                               |
| grad_O2H_chdi2        | Concentration gradient, O2H                   | mol/m <sup>4</sup>      |                                                                               |
| dflux_O2H_chdi2       | Diffusive flux, O2H                           | mol/(m <sup>2</sup> *s) |                                                                               |
| grad_Haq_r_chdi       | Concentration gradient, Haq, r component      | mol/m <sup>4</sup>      | Haqr                                                                          |
| dflux_Haq_r_chdi      | Diffusive flux, Haq, r component              | mol/(m <sup>2</sup> *s) | -Drr_Haq_chdi * Haqr-Drz_Haq_chdi * Haqz                                      |
| grad_Haq_z_chdi       | Concentration gradient, Haq, z component      | mol/m <sup>4</sup>      | Haqz                                                                          |
| dflux_Haq_z_chdi      | Diffusive flux, Haq, z component              | mol/(m <sup>2</sup> *s) | -Dzr_Haq_chdi * Haqr-Dzz_Haq_chdi * Haqz                                      |
| grad_Haq_chdi         | Concentration gradient, Haq                   | mol/m <sup>4</sup>      | sqrt(grad_Haq_r_chdi <sup>2</sup> +grad_Haq_z_chdi <sup>2</sup> )             |
| dflux_Haq_chdi        | Diffusive flux, Haq                           | mol/(m <sup>2</sup> *s) | sqrt(dflux_Haq_r_chdi <sup>2</sup> +dflux_Haq_z_chdi <sup>2</sup> )           |
| grad_Fcplusaq_r_chdi  | Concentration gradient, Fcplusaq, r component | mol/m <sup>4</sup>      | Fcplusaqr                                                                     |
| dflux_Fcplusaq_r_chdi | Diffusive flux, Fcplusaq, r component         | mol/(m <sup>2</sup> *s) | -Drr_Fcplusaq_chdi * Fcplusaqr-Drz_Fcplusaq_chdi * Fcplusaqz                  |
| grad_Fcplusaq_z_chdi  | Concentration gradient, Fcplusaq, z component | mol/m <sup>4</sup>      | Fcplusaqz                                                                     |
| dflux_Fcplusaq_z_chdi | Diffusive flux, Fcplusaq, z component         | mol/(m <sup>2</sup> *s) | -Dzr_Fcplusaq_chdi * Fcplusaqr-Dzz_Fcplusaq_chdi * Fcplusaqz                  |
| grad_Fcplusaq_chdi    | Concentration gradient, Fcplusaq              | mol/m <sup>4</sup>      | sqrt(grad_Fcplusaq_r_chdi <sup>2</sup> +grad_Fcplusaq_z_chdi <sup>2</sup> )   |
| dflux_Fcplusaq_chdi   | Diffusive flux, Fcplusaq                      | mol/(m <sup>2</sup> *s) | sqrt(dflux_Fcplusaq_r_chdi <sup>2</sup> +dflux_Fcplusaq_z_chdi <sup>2</sup> ) |
